# Supplementary material for: A Brief Online Implicit Bias Intervention for School Mental Health Clinicians
Source: Int J Environ Res Public Health. 2022 Jan 7;19(2):679. doi: 10.3390/ijerph19020679 (PMC8776032; doi:10.3390/ijerph19020679)
Supplement: Supplementary file 1 [file ijerph-19-00679-s001.zip › ijerph-1466776-supplementary.pdf]

## Implicit Bias Knowledge Quiz

Answers in **bold**

1. Stereotyping is...
  - a. an automatic cognitive processes that often operates beyond our conscious awareness
  - b. often inaccurate and can contribute to biased decision-making
  - c. a crucial survival skill emerging from eons of human evolution
  - d. **All of the above**
  
2. Stereotypes can operate and affect our behaviors...
  - a. as long as we can access the stereotype information in our memory
  - b. even when we do not believe them to be true
  - c. even if we gain awareness and use effective strategies to counter them
  - d. **a & b**
  
3. Implicit bias can affect our behavior and interactions with others...
  - a. only when we are aware of the biases
  - b. **despite our intentions to be egalitarian**
  - c. when we are with others like us (in-group members)
  - d. only when we feel threatened
  
4. Clinicians' implicit bias contributes to...
  - a. Poor treatment outcomes for minority youth (i.e., health disparities)
  - b. Strained clinician-student interactions and weak therapeutic alliance
  - c. Poor student treatment engagement and premature dropout
  - d. **All of the above**
  
5. The "Bias Blind Spot" refers to...
  - a. The inability to see oneself as the victim of bias.
  - b. **The difficulty with recognizing bias operating in one's own mind.**
  - c. The inability of the dominate group to see bias all around them.
  - d. The difficulty of seeing one's significant other as biased against us.
  
6. The Implicit Association Test...
  - a. **Is a research tool designed to assess one's implicit bias based on reaction times**
  - b. is designed to identify racist ideology
  - c. detects one's unconscious associations with biased or egalitarian beliefs
  - d. is a very accurate test of one's true beliefs

7. Which of the following is an effective implicit bias neutralization strategy (select all that apply)
- a. **Finding out what you have in common with someone**
  - b. Enthusiastically asserting egalitarian beliefs
  - c. **Actively seeking out information to challenge your assumptions**
  - d. Systematically identify how implicit biases is operating in everyone around you
8. Seeking Commonality can be an effective bias neutralization strategy... (select all that apply)
- a. **especially when used with open-ended questions to tap into core values.**
  - b. because shared interests can foster mutual attraction and friendship
  - c. only when both parties have a lot in common.
  - d. **because learning that you have some things in common with someone can help you see them more like an in-group member (e.g., one of us).**
9. Which of the following is not an effective approach for gaining perspective to better understand someone else's experience:
- a. **Carefully imagine how you would feel and what you would do in that person's situation**
  - b. Take into consideration the person's context, history, and lived experiences, before imagining how *they* would feel in their situation.
  - c. Be genuinely curious about their experiences and listen with an open mind.
  - d. Accept the reality of their experience even if it challenges some of your own beliefs.
10. Confirmation Bias is...
- a. The tendency to believe that everything positive is true
  - b. **The tendency for the brain to seek out and retain information that supports one's beliefs, while ignoring/dismissing information that challenges our beliefs.**
  - c. Harmless because everyone is prone to it, thereby equaling the playing field
  - d. Easy to challenge because the brain can switch to attending to belief-inconsistent information if one simply shifts their intentions.
